# Supplementary material for: Differences in Driving Anger among Professional Drivers: A Cross-Cultural Study
Source: MDPI journal article supplement (doi:10.3390/ijerph19074168), 2022-03-31
Supplement: s1 [file s1]

## Supplementary Material

**Table S1.** Demographic and driving characteristics of professional drivers by categories of driving licenses in Serbia

| Demographic variables                                                  |                  | Driver type       |                   |                   |                   |
|------------------------------------------------------------------------|------------------|-------------------|-------------------|-------------------|-------------------|
|                                                                        |                  | Taxi (n=102)      | Bus (n=102)       | Truck (n=109)     | Total (n=313)     |
| Gender                                                                 | Male             | 102 (100.0)       | 101 (99.0)        | 109 (100.0)       | 312 (99.7)        |
|                                                                        | Female           | 0 (0.0)           | 1 (1.0)           | 0 (0.0)           | 1 (0.3)           |
| Age                                                                    | Mean (SD)        | 49.9 (8.2)        | 47.3 (8.6)        | 38.0 (7.7)        | 44.9 (9.7)        |
|                                                                        | 18 - 34          | 5 (4.9)           | 6 (5.9)           | 38 (34.9)         | 49 (15.7)         |
|                                                                        | 35 - 49          | 41 (40.2)         | 53 (52.0)         | 62 (56.9)         | 156 (49.8)        |
|                                                                        | 50 - 64          | 54 (52.9)         | 40 (39.2)         | 9 (8.3)           | 103 (32.9)        |
|                                                                        | 65+              | 2 (2.0)           | 3 (2.9)           | 0 (0.0)           | 5 (1.6)           |
| Educational attainment                                                 | Primary school   | 2 (2.0)           | 3 (2.9)           | 2 (1.8)           | 7 (2.2)           |
|                                                                        | Secondary school | 89 (87.3)         | 93 (91.2)         | 92 (84.4)         | 274 (87.5)        |
|                                                                        | Higher education | 11 (10.8)         | 6 (5.9)           | 15 (5.9)          | 32 (10.2)         |
| Years of professional driving experience                               | Mean (SD)        | 26.8 (8.2)        | 20.5 (9.5)        | 15.2 (8.7)        | 20.7 (10.0)       |
|                                                                        | 0 - 5            | 0 (0.0)           | 8 (7.8)           | 17 (15.6)         | 25 (8.0)          |
|                                                                        | 6 - 10           | 1 (1.0)           | 6 (5.9)           | 21 (19.3)         | 28 (8.9)          |
|                                                                        | 11 - 15          | 13 (12.7)         | 21 (20.6)         | 22 (20.2)         | 56 (17.9)         |
|                                                                        | 16 and above     | 88 (86.3)         | 67 (65.7)         | 49 (45.0)         | 204 (65.2)        |
| Annual mileage                                                         | Mean (SD)        | 73676.5 (24981.2) | 46299.0 (26378.7) | 93572.5 (37509.2) | 71683.4 (35967.2) |
|                                                                        | 0 - 10.000       | 0 (0.0)           | 3 (2.9)           | 0 (0)             | 3 (1.0)           |
|                                                                        | 10.001 - 30.000  | 3 (2.9)           | 16 (15.7)         | 4 (3.7)           | 23 (7.3)          |
|                                                                        | 30.001 - 60.000  | 37 (36.3)         | 65 (63.7)         | 20 (18.3)         | 122 (39.0)        |
|                                                                        | 60.000 and above | 62 (60.8)         | 18 (17.6)         | 85 (78.0)         | 165 (52.7)        |
| Involvement in a driving violation in the last 3 years (self-reported) | Yes              | 55 (53.9)         | 66 (64.7)         | 62 (56.9)         | 183 (58.5)        |
|                                                                        | No               | 47 (46.1)         | 36 (35.3)         | 47 (43.1)         | 130 (41.5)        |
| Involvement in a road accident in the last 3 years (self-reported)     | Yes              | 61 (59.8)         | 57 (55.9)         | 75 (68.8)         | 193 (61.7)        |
|                                                                        | No               | 41 (40.2)         | 45 (44.1)         | 34 (31.2)         | 120 (38.3)        |

**Table S2.** Demographic and driving characteristics of professional drivers by categories of driving licenses in Montenegro

| Demographic variables                                                  |                  | Driver type       |                   |                   |                   |
|------------------------------------------------------------------------|------------------|-------------------|-------------------|-------------------|-------------------|
|                                                                        |                  | Taxi (n=128)      | Bus (n=126)       | Truck (n=186)     | Total (n=440)     |
| Gender                                                                 | Male             | 118 (92.2)        | 126 (100.0)       | 185 (99.5)        | 429 (97.5)        |
|                                                                        | Female           | 10 (7.8)          | 0 (0.0)           | 1 (0.5)           | 11 (2.5)          |
| Age                                                                    | Mean (SD)        | 44.1 (11.2)       | 46.3 (11.3)       | 40.0 (10.7)       | 43.0 (11.4)       |
|                                                                        | 18 - 34          | 26 (20.3)         | 20 (15.9)         | 65 (34.9)         | 111 (25.2)        |
|                                                                        | 35 - 49          | 58 (45.3)         | 55 (43.7)         | 85 (45.7)         | 198 (45.0)        |
|                                                                        | 50 - 64          | 41 (32.0)         | 43 (34.1)         | 33 (17.7)         | 117 (26.6)        |
|                                                                        | 65+              | 3 (2.3)           | 8 (6.3)           | 3 (1.6)           | 14 (3.2)          |
| Educational attainment                                                 | Primary school   | 1 (0.8)           | 11 (8.7)          | 9 (4.8)           | 21 (4.8)          |
|                                                                        | Secondary school | 109 (85.2)        | 107 (84.9)        | 159 (85.5)        | 375 (85.2)        |
|                                                                        | Higher education | 18 (14.1)         | 8 (6.3)           | 18 (9.7)          | 44 (10.0)         |
| Years of professional driving experience                               | Mean (SD)        | 23.2 (10.9)       | 20.3 (11.2)       | 17.1 (11.2)       | 19.8 (11.4)       |
|                                                                        | 0 - 5            | 8 (6.3)           | 11 (8.7)          | 32 (17.2)         | 51 (11.6)         |
|                                                                        | 6 - 10           | 11 (8.6)          | 17 (13.5)         | 28 (15.1)         | 56 (12.7)         |
|                                                                        | 11 - 15          | 14 (10.9)         | 23 (18.3)         | 34 (18.3)         | 71 (16.1)         |
|                                                                        | 16 and above     | 95 (74.2)         | 75 (59.5)         | 92 (49.5)         | 262 (59.5)        |
| Annual mileage                                                         | Mean (SD)        | 48997.2 (30966.7) | 52959.5 (43552.4) | 63941.9 (42850.1) | 56449.4 (40432.0) |
|                                                                        | 0 - 10.000       | 5 (3.9)           | 10 (7.9)          | 7 (3.8)           | 22 (5.0)          |
|                                                                        | 10.001 - 30.000  | 37 (28.9)         | 49 (38.9)         | 48 (25.8)         | 134 (30.5)        |
|                                                                        | 30.001 - 60.000  | 52 (40.6)         | 22 (7.5)          | 45 (24.2)         | 119 (27.0)        |
|                                                                        | 60.000 and above | 34 (26.6)         | 45 (35.7)         | 86 (46.2)         | 165 (37.5)        |
| Involvement in a driving violation in the last 3 years (self-reported) | Yes              | 52 (40.6)         | 39 (31.0)         | 61 (32.8)         | 152 (34.5)        |
|                                                                        | No               | 76 (59.4)         | 87 (69.0)         | 125 (67.2)        | 288 (65.5)        |
| Involvement in a road accident in the last 3 years (self-reported)     | Yes              | 89 (69.5)         | 96 (76.2)         | 145 (78.0)        | 330 (75.0)        |
|                                                                        | No               | 39 (30.5)         | 30 (23.8)         | 41 (22.0)         | 110 (25.0)        |

**Table S3.** Demographic and driving characteristics of professional drivers by categories of driving licenses in Bosnia and Herzegovina

| Demographic variables                                                  |                  | Driver type       |                   |                   |                   |
|------------------------------------------------------------------------|------------------|-------------------|-------------------|-------------------|-------------------|
|                                                                        |                  | Taxi (n=101)      | Bus (n=100)       | Truck (n=100)     | Total (n=301)     |
| Gender                                                                 | Male             | 101 (100.0)       | 99 (99.0)         | 100 (100.0)       | 299 (99.7)        |
|                                                                        | Female           | 0 (0.0)           | 1 (1.0)           | 0 (0.0)           | 1 (0.3)           |
| Age                                                                    | Mean (SD)        | 41.7 (12.3)       | 44.3 (9.8)        | 39.6 (11.0)       | 41.8 (11.2)       |
|                                                                        | 18 - 34          | 29 (28.7)         | 17 (17.0)         | 34 (34.0)         | 80 (26.6)         |
|                                                                        | 35 - 49          | 41 (40.6)         | 49 (49.0)         | 46 (46.0)         | 136 (45.2)        |
|                                                                        | 50 - 64          | 30 (29.7)         | 33 (33.0)         | 18 (18.0)         | 81 (36.9)         |
|                                                                        | 65+              | 1 (1.0)           | 1 (1.0)           | 2 (2.0)           | 4 (1.3)           |
| Educational attainment                                                 | Primary school   | 0 (0.0)           | 1 (1.0)           | 0 (0.0)           | 1 (0.3)           |
|                                                                        | Secondary school | 95 (94.1)         | 96 (96.0)         | 97 (97.0)         | 288 (95.7)        |
|                                                                        | Higher education | 6 (5.9)           | 3 (3.0)           | 3 (3.0)           | 12 (4.0)          |
| Years of professional driving experience                               | Mean (SD)        | 20.2 (11.8)       | 16.3 (10.9)       | 15.0 (10.8)       | 17.2 (11.3)       |
|                                                                        | 0 - 5            | 9 (8.9)           | 19 (19.0)         | 24 (24.0)         | 52 (17.3)         |
|                                                                        | 6 - 10           | 18 (17.8)         | 9 (9.0)           | 12 (12.0)         | 39 (13.0)         |
|                                                                        | 11 - 15          | 13 (12.9)         | 21 (21.0)         | 25 (25.0)         | 59 (19.6)         |
|                                                                        | 16 and above     | 61 (60.4)         | 51 (51.0)         | 39 (39.0)         | 151 (50.2)        |
| Annual mileage                                                         | Mean (SD)        | 69469.4 (24221.9) | 71827.5 (41433.6) | 96252.5 (23557.5) | 79150.9 (33047.7) |
|                                                                        | 0 - 10.000       | 0 (0.0)           | 3 (3.0)           | 0 (0.0)           | 3 (1.0)           |
|                                                                        | 10.001 - 30.000  | 7 (6.9)           | 17 (17.0)         | 1 (1.0)           | 25 (8.3)          |
|                                                                        | 30.001 - 60.000  | 25 (24.8)         | 27 (27.0)         | 3 (3.0)           | 55 (18.3)         |
|                                                                        | 60.000 and above | 69 (68.3)         | 53 (53.0)         | 96 (96.0)         | 218 (72.4)        |
| Involvement in a driving violation in the last 3 years (self-reported) | Yes              | 43 (42.6)         | 55 (55.0)         | 37 (37.0)         | 135 (44.9)        |
|                                                                        | No               | 58 (57.4)         | 45 (45.0)         | 63 (63.0)         | 166 (55.1)        |
| Involvement in a road accident in the last 3 years (self-reported)     | Yes              | 72 (71.3)         | 78 (78.0)         | 69 (69.0)         | 219 (72.8)        |
|                                                                        | No               | 29 (28.7)         | 22 (22.0)         | 31 (31.0)         | 82 (27.2)         |

**Table S4.** Fit indices of the short version of DAX in Serbia, Montenegro and Bosnia and Herzegovina

|                                         | <i>DWLS <math>\chi^2</math></i> | <i>df</i> | <i>RMSEA</i> | <i>RMSEA CI</i> | <i>SRMR</i> | <i>CFI</i> | <i>TLI</i> |
|-----------------------------------------|---------------------------------|-----------|--------------|-----------------|-------------|------------|------------|
| Serbia ( <i>n</i> =313)                 | 99.308                          | 84        | 0.024        | [0.000, 0.041]  | 0.059       | 0.995      | 0.994      |
| Montenegro ( <i>n</i> =440)             | 128.888***                      | 84        | 0.035        | [0.022, 0.046]  | 0.054       | 0.983      | 0.979      |
| Bosnia and Herzegovina ( <i>n</i> =301) | 98.803                          | 84        | 0.023        | [0.000, 0.041]  | 0.055       | 0.992      | 0.990      |

Note.  $\chi^2$  = Chi-square; *df* = degree of freedom; *RMSEA* = Root Mean Square Error of Approximation; *CI* = Confidence Interval; *SRMR* = Standardized Root Mean Square Residual; *CFI* = Comparative Fit Index; *TLI* = Tucker-Lewis Index; \**p* < 0.05, \*\**p* < 0.01, \*\*\**p* < 0.001

**Table S5.** Standardized item-factor loadings for the short version of DAX in Serbia, Montenegro and Bosnia and Herzegovina

| Item no.                                               | Items                                                                        | Serbia | Montenegro | Bosnia and Herzegovina |
|--------------------------------------------------------|------------------------------------------------------------------------------|--------|------------|------------------------|
| <b>F1: Verbal Aggressive Expression</b>                |                                                                              |        |            |                        |
| 6                                                      | I make negative comments about the other driver                              | 0.640  | 0.668      | 0.680                  |
| 28                                                     | I swear at the other driver aloud.                                           | 0.834  | 0.722      | 0.772                  |
| 38                                                     | I yell at the other driver.                                                  | 0.890  | 0.663      | 0.732                  |
| <b>F2: Physical Aggressive Expression</b>              |                                                                              |        |            |                        |
| 8                                                      | I try to get out of the car and tell the other driver off.                   | 0.576  | 0.664      | 0.683                  |
| 10                                                     | I roll down the window to help communicate my anger.                         | 0.644  | 0.673      | 0.811                  |
| 21                                                     | I try to scare the other driver.                                             | 0.715  | 0.684      | 0.730                  |
| 41                                                     | I try to get out of the car and have a physical fight with the other driver. | 0.607  | 0.562      | 0.559                  |
| <b>F3: Using the Vehicle for Aggressive Expression</b> |                                                                              |        |            |                        |
| 2                                                      | I drive right up on the other driver's bumper.                               | 0.630  | 0.641      | 0.611                  |
| 22                                                     | I do to other drivers what they did to me.                                   | 0.699  | 0.550      | 0.561                  |
| 27                                                     | I drive a lot faster than I was.                                             | 0.654  | 0.504      | 0.499                  |
| <b>F4: Adaptive/Constructive Expression</b>            |                                                                              |        |            |                        |
| 26                                                     | I try to think of positive solutions to deal with the situation.             | 0.675  | 0.723      | 0.699                  |
| 29                                                     | I tell myself it is not worth getting all mad about.                         | 0.702  | 0.721      | 0.644                  |
| 36                                                     | I tell myself it's not worth getting involved in.                            | 0.832  | 0.767      | 0.778                  |
| 45                                                     | I just try and accept that there are frustrating situations while driving.   | 0.661  | 0.540      | 0.530                  |
| 48                                                     | I tell myself to ignore it.                                                  | 0.760  | 0.782      | 0.712                  |

Note. *n* =313 Serbian; *n* = 440 Montenegrin; *n* = 301 Bosnian

**Table S6.** Measurement invariance of the four-factor model of the short version of DAX across countries and types of professional drivers.

|                                       | <i>DWLS <math>\chi^2</math></i> | <i>df</i> | <i>CFI</i> | <i>RMSEA</i> | <i><math>\Delta DWLS \chi^2</math></i> | <i><math>\Delta df</math></i> | <i>p</i> | <i><math>\Delta CFI</math></i> | <i><math>\Delta RMSEA</math></i> |
|---------------------------------------|---------------------------------|-----------|------------|--------------|----------------------------------------|-------------------------------|----------|--------------------------------|----------------------------------|
| <b>Country</b>                        |                                 |           |            |              |                                        |                               |          |                                |                                  |
| Configural                            | 325.00                          | 252       | 0.990      | 0.029        |                                        |                               |          |                                |                                  |
| Metric                                | 392.35                          | 274       | 0.983      | 0.035        | 67.35                                  | 22                            | < 0.001  | 0.006                          | 0.006                            |
| Scalar                                | 456.41                          | 296       | 0.978      | 0.039        | 64.06                                  | 22                            | < 0.001  | 0.006                          | 0.004                            |
| Residual                              | 522.53                          | 326       | 0.972      | 0.041        | 66.12                                  | 30                            | < 0.001  | 0.005                          | 0.002                            |
| <b>Types of professional drivers.</b> |                                 |           |            |              |                                        |                               |          |                                |                                  |
| Configural                            | 314.15                          | 252       | 0.991      | 0.027        |                                        |                               |          |                                |                                  |
| Metric                                | 463.23                          | 274       | 0.973      | 0.044        | 149.08                                 | 22                            | < 0.001  | 0.018                          | 0.018                            |
| Scalar                                | 519.82                          | 296       | 0.968      | 0.046        | 56.59                                  | 22                            | < 0.001  | 0.005                          | 0.002                            |
| Residual                              | 609.44                          | 326       | 0.959      | 0.050        | 89.62                                  | 30                            | < 0.001  | 0.009                          | 0.003                            |

**Table S7.** Univariate descriptive statistics of the DAS and the DAX-short scales by types of professional drivers in Serbia

|           |     | <b>Taxi</b> |           |          |          | <b>Bus</b>  |           |          |          | <b>Truck</b> |           |          |          |
|-----------|-----|-------------|-----------|----------|----------|-------------|-----------|----------|----------|--------------|-----------|----------|----------|
|           |     | <i>Mean</i> | <i>SD</i> | <i>S</i> | <i>K</i> | <i>Mean</i> | <i>SD</i> | <i>S</i> | <i>K</i> | <i>Mean</i>  | <i>SD</i> | <i>S</i> | <i>K</i> |
| DAS       | Dis | 3.21        | 0.66      | -0.16    | -0.31    | 2.33        | 0.83      | 0.79     | -0.04    | 2.79         | 0.73      | 0.40     | -0.68    |
|           | HG  | 2.34        | 1.05      | 0.36     | -0.81    | 1.87        | 0.90      | 1.04     | 0.33     | 2.76         | 0.94      | 0.47     | -0.15    |
|           | ID  | 2.43        | 0.98      | 0.33     | -0.75    | 2.30        | 1.04      | 0.83     | -0.01    | 2.62         | 0.73      | 0.45     | 0.19     |
|           | PP  | 1.91        | 0.70      | 0.86     | 0.00     | 1.19        | 0.42      | 3.86     | 20.52    | 1.86         | 0.65      | 0.46     | -0.72    |
|           | SD  | 2.75        | 0.72      | 0.08     | -0.16    | 1.61        | 0.59      | 1.49     | 2.53     | 2.02         | 0.61      | 1.30     | 1.77     |
|           | TO  | 3.14        | 0.73      | -0.48    | -0.59    | 1.86        | 0.62      | 1.31     | 2.05     | 2.80         | 0.75      | 0.19     | -0.47    |
| DAX-short | Ver | 2.32        | 1.06      | 0.35     | -1.00    | 1.55        | 0.67      | 1.27     | 1.23     | 1.91         | 0.75      | 0.71     | 0.00     |
|           | Phy | 1.63        | 0.68      | 1.21     | 1.20     | 1.18        | 0.46      | 3.64     | 14.17    | 1.46         | 0.58      | 1.42     | 1.62     |
|           | Veh | 2.10        | 0.85      | 0.28     | -0.83    | 1.35        | 0.46      | 1.57     | 2.64     | 1.65         | 0.62      | 1.13     | 1.11     |
|           | Adp | 3.35        | 0.97      | 0.15     | -0.77    | 3.69        | 0.93      | -0.42    | -0.22    | 3.18         | 1.16      | -0.35    | -1.09    |

Note. *SD* = Standard Deviation; *S* = Skewness, *K* = Kurtosis

**Table S8.** Univariate descriptive statistics of the DAS and the DAX-short scales by types of professional drivers in Montenegro

|           |     | <b>Taxi</b> |           |          |          | <b>Bus</b>  |           |          |          | <b>Truck</b> |           |          |          |
|-----------|-----|-------------|-----------|----------|----------|-------------|-----------|----------|----------|--------------|-----------|----------|----------|
|           |     | <i>Mean</i> | <i>SD</i> | <i>S</i> | <i>K</i> | <i>Mean</i> | <i>SD</i> | <i>S</i> | <i>K</i> | <i>Mean</i>  | <i>SD</i> | <i>S</i> | <i>K</i> |
| DAS       | Dis | 2.95        | 0.96      | -0.10    | -0.74    | 2.42        | 0.76      | 0.22     | -0.81    | 2.79         | 0.98      | 0.42     | -0.65    |
|           | HG  | 2.65        | 1.18      | 0.26     | -0.99    | 2.15        | 0.94      | 0.51     | -0.94    | 2.10         | 1.06      | 0.94     | 0.04     |
|           | ID  | 2.74        | 1.08      | 0.10     | -0.88    | 2.44        | 0.95      | 0.49     | -0.04    | 2.87         | 1.01      | -0.25    | -0.88    |
|           | PP  | 1.87        | 0.91      | 1.29     | 1.33     | 1.51        | 0.60      | 1.48     | 1.93     | 1.54         | 0.82      | 1.82     | 2.99     |
|           | SD  | 2.34        | 0.88      | 0.36     | -0.58    | 1.94        | 0.68      | 0.97     | 0.49     | 2.02         | 0.79      | 0.87     | 0.68     |
|           | TO  | 2.47        | 0.84      | 0.39     | 0.13     | 2.21        | 0.71      | 0.31     | -1.05    | 2.21         | 0.75      | 0.70     | 0.45     |
| DAX-short | Ver | 1.78        | 0.88      | 0.94     | -0.23    | 1.55        | 0.64      | 1.07     | 0.41     | 1.51         | 0.66      | 1.37     | 1.33     |
|           | Phy | 1.46        | 0.63      | 1.34     | 0.88     | 1.38        | 0.60      | 1.94     | 3.16     | 1.35         | 0.60      | 2.26     | 4.90     |
|           | Veh | 1.66        | 0.61      | 0.80     | -0.06    | 1.59        | 0.66      | 1.14     | 0.42     | 1.47         | 0.66      | 1.69     | 2.82     |
|           | Adp | 3.46        | 1.13      | -0.75    | -0.37    | 3.63        | 0.94      | -0.63    | -0.13    | 3.58         | 1.06      | -0.92    | 0.07     |

Note. *SD* = Standard Deviation; *S* = Skewness, *K* = Kurtosis

**Table S9.** Univariate descriptive statistics of the DAS and the DAX-short scales by types of professional drivers in Bosnia and Herzegovina

|           |     | Taxi |      |       |       | Bus  |      |       |       | Truck |      |       |       |
|-----------|-----|------|------|-------|-------|------|------|-------|-------|-------|------|-------|-------|
|           |     | Mean | SD   | S     | K     | Mean | SD   | S     | K     | Mean  | SD   | S     | K     |
| DAS       | Dis | 2.97 | 0.98 | -0.13 | -1.06 | 2.73 | 0.93 | 0.22  | -0.73 | 2.97  | 0.83 | 0.10  | -0.41 |
|           | HG  | 2.32 | 1.22 | 0.61  | -0.75 | 2.02 | 1.00 | 1.10  | 0.92  | 2.35  | 1.04 | 0.48  | -0.55 |
|           | ID  | 2.72 | 1.03 | 0.58  | -0.39 | 2.37 | 0.96 | 0.32  | -0.84 | 2.65  | 1.02 | 0.33  | -0.62 |
|           | PP  | 1.64 | 0.81 | 1.48  | 1.50  | 1.36 | 0.48 | 1.69  | 2.78  | 1.73  | 0.74 | 1.39  | 1.68  |
|           | SD  | 2.18 | 0.83 | 0.85  | 0.56  | 1.85 | 0.71 | 1.33  | 2.50  | 2.25  | 0.82 | 0.67  | 0.01  |
|           | TO  | 2.42 | 0.91 | 0.48  | -0.26 | 2.06 | 0.61 | 0.08  | -0.98 | 2.27  | 0.66 | 0.33  | 0.01  |
| DAX-short | Ver | 1.80 | 0.88 | 1.39  | 1.90  | 1.42 | 0.56 | 1.58  | 2.54  | 1.91  | 0.86 | 0.61  | -0.66 |
|           | Phy | 1.32 | 0.65 | 2.41  | 5.20  | 1.20 | 0.37 | 2.00  | 3.12  | 1.47  | 0.70 | 1.62  | 2.18  |
|           | Veh | 1.67 | 0.80 | 1.64  | 2.67  | 1.54 | 0.60 | 1.05  | 0.30  | 1.98  | 0.72 | 0.43  | 0.00  |
|           | Adp | 3.32 | 1.07 | -0.53 | -0.46 | 3.43 | 1.05 | -0.59 | -0.52 | 3.35  | 0.88 | -0.13 | -0.16 |

Note. *SD* = Standard Deviation; *S* = Skewness, *K* = Kurtosis
